# Supplementary material for: Socioeconomic position, lifestyle habits and biomarkers of epigenetic aging: a multi-cohort analysis
Source: PubMed Central journal article supplement (PMC6503871; doi:10.18632/aging.101900), 2019-04-14
Supplement: aging-11-101900-s002.pdf [file aging-11-101900-s002.pdf]

## SUPPLEMENTARY TABLES

**Table S1. Results of linear regressions using epigenetic aging biomarkers (WBC adjusted) as outcomes and lifestyle related risk factors as predictors.**

|                                      |            | SEMs                                   |                                       | HorvathEAA                            |                             |
|--------------------------------------|------------|----------------------------------------|---------------------------------------|---------------------------------------|-----------------------------|
|                                      |            | Model 1                                | Model 2                               | Model 1                               | Model 2                     |
| <b>Education (ref: High)</b>         | Medium     | <b>0.28 (0.06; 0.49)*</b>              | <b>0.23 (-0.02; 0.48)<sup>+</sup></b> | 0.1 (-0.08; 0.28)                     | 0.09 (-0.1; 0.29)           |
|                                      | High       | <b>0.32 (0.09; 0.54)**</b>             | <b>0.27 (0.04; 0.5)*</b>              | <b>0.19 (-0.01; 0.38)<sup>+</sup></b> | 0.14 (-0.06; 0.34)          |
| <b>Smoking (ref: Never)</b>          | Former     | <b>0.24 (0.08; 0.4)**</b>              | <b>0.28 (0.12; 0.43)***</b>           | <b>0.18 (0.02; 0.35)*</b>             | <b>0.17 (0.01; 0.32)*</b>   |
|                                      | Current    | <b>0.54 (0.32; 0.76)***</b>            | <b>0.54 (0.32; 0.77)***</b>           | 0.12 (-0.07; 0.31)                    | 0.1 (-0.1; 0.3)             |
| <b>Obesity (ref: BMI &lt; 25)</b>    | BMI < 30   | 0.02 (-0.17; 0.2)                      | 0 (-0.18; 0.17)                       | <b>0.37 (0.22; 0.52)***</b>           | <b>0.35 (0.19; 0.5)***</b>  |
|                                      | BMI ≥ 30   | -0.11 (-0.33; 0.1)                     | -0.13 (-0.34; 0.08)                   | <b>0.45 (0.27; 0.63)***</b>           | <b>0.44 (0.25; 0.62)***</b> |
| <b>Alcohol (ref: Abstainer)</b>      | Occasional | <b>-0.16 (-0.35; 0.03)<sup>+</sup></b> | -0.14 (-0.33; 0.04)                   | -0.01 (-0.19; 0.16)                   | 0.02 (-0.16; 0.19)          |
|                                      | Habitual   | 0.18 (-0.06; 0.42)                     | 0.13 (-0.12; 0.38)                    | <b>0.2 (-0.03; 0.44)<sup>+</sup></b>  | <b>0.26 (0.03; 0.49)*</b>   |
| <b>Physical activity (ref: High)</b> | Medium     | -0.04 (-0.26; 0.18)                    | -0.06 (-0.24; 0.13)                   | 0.08 (-0.08; 0.24)                    | 0.07 (-0.09; 0.24)          |
|                                      | Low        | 0.03 (-0.27; 0.33)                     | -0.02 (-0.3; 0.26)                    | <b>0.22 (0.05; 0.4)*</b>              | <b>0.19 (0.01; 0.37)*</b>   |
|                                      |            | HannumEAA                              |                                       | LevineEAA                             |                             |
|                                      |            | Model 1                                | Model 2                               | Model 1                               | Model 2                     |
| <b>Education (ref: High)</b>         | Medium     | <b>0.3 (0.14; 0.46)***</b>             | <b>0.24 (0.06; 0.42)**</b>            | <b>0.36 (0.05; 0.68)*</b>             | 0.16 (-0.23; 0.55)          |
|                                      | High       | <b>0.32 (0.16; 0.48)***</b>            | <b>0.28 (0.12; 0.43)***</b>           | <b>0.85 (0.53; 1.17)***</b>           | <b>0.57 (0.25; 0.89)***</b> |
| <b>Smoking (ref: Never)</b>          | Former     | <b>0.15 (0.03; 0.26)*</b>              | <b>0.1 (-0.01; 0.22)<sup>+</sup></b>  | <b>0.68 (0.49; 0.87)***</b>           | <b>0.58 (0.38; 0.78)***</b> |
|                                      | Current    | <b>0.46 (0.26; 0.65)***</b>            | <b>0.4 (0.21; 0.6)***</b>             | <b>1.62 (1.35; 1.89)***</b>           | <b>1.48 (1.19; 1.77)***</b> |
| <b>Obesity (ref: BMI &lt; 25)</b>    | BMI < 30   | <b>0.2 (0.08; 0.32)**</b>              | <b>0.19 (0.06; 0.32)**</b>            | <b>0.59 (0.3; 0.88)***</b>            | <b>0.5 (0.26; 0.74)***</b>  |
|                                      | BMI ≥ 30   | <b>0.25 (0.11; 0.39)***</b>            | <b>0.24 (0.1; 0.39)***</b>            | <b>1.25 (0.92; 1.58)***</b>           | <b>1.18 (0.87; 1.48)***</b> |
| <b>Alcohol (ref: Abstainer)</b>      | Occasional | -0.02 (-0.15; 0.11)                    | 0.05 (-0.09; 0.18)                    | -0.07 (-0.33; 0.19)                   | 0.09 (-0.14; 0.32)          |
|                                      | Habitual   | <b>0.24 (0.06; 0.42)**</b>             | <b>0.3 (0.1; 0.49)**</b>              | <b>0.91 (0.61; 1.2)***</b>            | <b>0.99 (0.66; 1.31)***</b> |
| <b>Physical activity (ref: High)</b> | Medium     | 0.09 (-0.07; 0.24)                     | 0.07 (-0.08; 0.22)                    | 0.17 (-0.17; 0.52)                    | 0.12 (-0.13; 0.37)          |
|                                      | Low        | 0.13 (-0.11; 0.37)                     | 0.07 (-0.19; 0.33)                    | 0.49 (-0.01; 0.98) <sup>+</sup>       | 0.27 (-0.13; 0.67)          |

\*\*\* p < 0.001; \*\* p < 0.01; \* p < 0.05; + p < 0.10

Model 1 includes age, sex, and cohort specific covariates; Model 2 includes additional adjustment for education, smoking, BMI, alcohol and physical activity.

**Table S2. Interaction with age and sex.**

|                                      |            | SEMs                                   |                                     | HorvathEAA                           |                     |
|--------------------------------------|------------|----------------------------------------|-------------------------------------|--------------------------------------|---------------------|
|                                      |            | age                                    | sex                                 | age                                  | sex                 |
| <b>Education (ref: High)</b>         | Medium     | 0.02 (-0.01; 0.05)                     | <b>-0.08 (-0.16; 0)<sup>+</sup></b> | 0 (-0.03; 0.03)                      | 0.02 (-0.39; 0.43)  |
|                                      | High       | 0.03 (0; 0.05) <sup>+</sup>            | -0.05 (-0.13; 0.02)                 | -0.01 (-0.04; 0.02)                  | 0.19 (-0.22; 0.59)  |
| <b>Smoking (ref: Never)</b>          | Former     | 0.01 (0; 0.03)                         | -0.07 (-0.15; 0) <sup>+</sup>       | <b>0.02 (0; 0.04)<sup>*</sup></b>    | 0 (-0.4; 0.4)       |
|                                      | Current    | <b>0.04 (0.01; 0.06)<sup>**</sup></b>  | -0.06 (-0.14; 0.02)                 | <b>0.03 (0.01; 0.05)<sup>*</sup></b> | 0.21 (-0.19; 0.61)  |
| <b>Obesity (ref: BMI &lt; 25)</b>    | BMI < 30   | <b>0.03 (0.01; 0.06)<sup>*</sup></b>   | -0.06 (-0.14; 0.02)                 | 0 (-0.03; 0.03)                      | 0.03 (-0.37; 0.43)  |
|                                      | BMI ≥ 30   | <b>0.02 (0; 0.04)<sup>+</sup></b>      | -0.05 (-0.13; 0.02)                 | 0 (-0.02; 0.02)                      | 0.23 (-0.17; 0.63)  |
| <b>Alcohol (ref: Abstainer)</b>      | Occasional | -0.01 (-0.04; 0.01)                    | -0.08 (-0.15; 0) <sup>+</sup>       | -0.01 (-0.03; 0.02)                  | 0.01 (-0.39; 0.41)  |
|                                      | Habitual   | 0.01 (-0.01; 0.04)                     | -0.06 (-0.14; 0.02)                 | 0 (-0.02; 0.03)                      | 0.19 (-0.21; 0.59)  |
| <b>Physical activity (ref: High)</b> | Medium     | 0 (-0.03; 0.02)                        | -0.08 (-0.16; 0) <sup>+</sup>       | -0.02 (-0.04; 0)                     | 0 (-0.4; 0.4)       |
|                                      | Low        | 0 (-0.02; 0.03)                        | -0.06 (-0.14; 0.02)                 | -0.01 (-0.03; 0.02)                  | 0.16 (-0.24; 0.57)  |
|                                      |            | HannumEAA                              |                                     | LevineEAA                            |                     |
|                                      |            | Age                                    | Sex                                 | Age                                  | sex                 |
| <b>Education (ref: High)</b>         | Medium     | 0.01 (-0.01; 0.02)                     | 0.03 (-0.32; 0.38)                  | 0 (-0.04; 0.03)                      | 0.13 (-0.44; 0.7)   |
|                                      | High       | <b>-0.02 (-0.04; 0)<sup>*</sup></b>    | 0.1 (-0.22; 0.43)                   | -0.01 (-0.05; 0.02)                  | -0.08 (-0.74; 0.59) |
| <b>Smoking (ref: Never)</b>          | Former     | <b>0.01 (0; 0.03)<sup>*</sup></b>      | -0.01 (-0.37; 0.35)                 | <b>0.02 (0; 0.04)<sup>+</sup></b>    | 0.09 (-0.47; 0.65)  |
|                                      | Current    | <b>0.04 (0.02; 0.06)<sup>***</sup></b> | 0.11 (-0.21; 0.43)                  | <b>0.03 (0; 0.07)<sup>+</sup></b>    | -0.06 (-0.72; 0.6)  |
| <b>Obesity (ref: BMI &lt; 25)</b>    | BMI < 30   | -0.01 (-0.03; 0.02)                    | 0.05 (-0.29; 0.4)                   | 0 (-0.03; 0.04)                      | 0.11 (-0.45; 0.67)  |
|                                      | BMI ≥ 30   | -0.01 (-0.02; 0.01)                    | 0.13 (-0.19; 0.46)                  | 0 (-0.03; 0.03)                      | -0.04 (-0.7; 0.63)  |
| <b>Alcohol (ref: Abstainer)</b>      | Occasional | 0 (-0.02; 0.02)                        | 0.03 (-0.31; 0.37)                  | 0.01 (-0.02; 0.04)                   | 0.08 (-0.48; 0.64)  |
|                                      | Habitual   | 0 (-0.02; 0.02)                        | 0.1 (-0.22; 0.43)                   | 0.01 (-0.02; 0.05)                   | -0.08 (-0.75; 0.58) |
| <b>Physical activity (ref: High)</b> | Medium     | 0 (-0.02; 0.01)                        | 0 (-0.35; 0.35)                     | <b>-0.03 (-0.06; 0)<sup>+</sup></b>  | 0.12 (-0.44; 0.68)  |
|                                      | Low        | 0 (-0.02; 0.02)                        | 0.07 (-0.25; 0.4)                   | 0 (-0.04; 0.03)                      | -0.07 (-0.73; 0.59) |

\*\*\* p < 0.001; \*\* p < 0.01; \* p < 0.05; + p < 0.10

**Table S3. Results of the enrichment analyses using the classification of the UCSC Genome Browser for the relationship with CpG islands, open chromatin state and DNase hypersensitivity.**

| Relation to CpG island according to UCSC Genome Browser | Permutation based p-value for enrichment |
|---------------------------------------------------------|------------------------------------------|
| Shores                                                  | 0.02                                     |
| Open chromatin evidence                                 | 0.03                                     |
| CpG Island                                              | 0.27                                     |
| Shelves                                                 | 1                                        |
| Non CpG Island                                          | 1                                        |
| DNase hypersensitivity evidence                         | 1                                        |

P-values were computed according to the algorithm implemented in the *regioneR* R package.

**Table S4. Results of the enrichment analyses using the ENCODE classification for chromatin states in embryonic stem cell (H1-hESC).**

| Chromatin state according to ENCODE ChIP-Seq | Permutation based p-value for enrichment |
|----------------------------------------------|------------------------------------------|
| Heterochromatin / Low signal / CNV           | < 0.0001                                 |
| Inactive / Poised promoter                   | < 0.0001                                 |
| Polycomb Repressed                           | 0.001                                    |
| Transcriptional elongation / Transition      | 1                                        |
| Weak Transcribed                             | 1                                        |
| Active promoter                              | 1                                        |
| Weak promoter                                | 1                                        |
| Strong enhancer                              | 1                                        |
| Weak / Poised enhancer                       | 1                                        |
| Insulator                                    | 1                                        |
| Non regulatory elements                      | 1                                        |

P-values were computed according to the algorithm implemented in the *regioneR* R package.

**Table S5. Results of the enrichment analyses using the ENCODE classification for 58 protein TFBS in non-treated embryonic stem cell (H1-hESC).**

| <b>Transcription Factor</b> | <b>Lab</b>  | <b>Permutation based p-value for enrichment</b> |
|-----------------------------|-------------|-------------------------------------------------|
| EZH2                        | Broad       | < 0.0001                                        |
| SUZ12                       | USC         | < 0.0001                                        |
| CtBP2                       | USC         | 0.15                                            |
| CHD1                        | Broad       | 0.27                                            |
| NRSF                        | HudsonAlpha | 0.88                                            |
| BCL11A                      | HudsonAlpha | 1                                               |
| c-Myc                       | UT-A        | 1                                               |
| POU5F1                      | HudsonAlpha | 1                                               |
| MafK                        | Stanford    | 1                                               |
| RXRA                        | HudsonAlpha | 1                                               |
| NANOG                       | HudsonAlpha | 1                                               |
| CHD1                        | Stanford    | 1                                               |
| c-Jun                       | Stanford    | 1                                               |
| RFX5                        | Stanford    | 1                                               |
| HDAC2                       | HudsonAlpha | 1                                               |
| FOSL1                       | HudsonAlpha | 1                                               |
| TCF12                       | Stanford    | 1                                               |
| CEBPB                       | HudsonAlpha | 1                                               |
| TEAD4                       | USC         | 1                                               |
| Max                         | UT-A        | 1                                               |
| CTCF                        | Stanford    | 1                                               |
| Rad21                       | Stanford    | 1                                               |
| Rad21                       | HudsonAlpha | 1                                               |
| BRCA1                       | Stanford    | 1                                               |
| CTCF                        | Broad       | 1                                               |
| CTCF                        | Stanford    | 1                                               |
| USF2                        | Stanford    | 1                                               |
| SP2                         | HudsonAlpha | 1                                               |
| JARID1A                     | Broad       | 1                                               |
| SIX5                        | HudsonAlpha | 1                                               |
| SRF                         | HudsonAlpha | 1                                               |
| USF-1                       | HudsonAlpha | 1                                               |
| ATF2                        | HudsonAlpha | 1                                               |
| JunD                        | Stanford    | 1                                               |
| ATF3                        | HudsonAlpha | 1                                               |
| Bach1                       | Stanford    | 1                                               |
| Nrf1                        | Stanford    | 1                                               |
| c-Myc                       | Stanford    | 1                                               |

|           |             |   |
|-----------|-------------|---|
| JunD      | HudsonAlpha | 1 |
| GABP      | HudsonAlpha | 1 |
| GTF2F1    | Stanford    | 1 |
| p300      | HudsonAlpha | 1 |
| Egr-1     | HudsonAlpha | 1 |
| Mxi1      | Stanford    | 1 |
| CHD2      | Stanford    | 1 |
| Znf143    | Stanford    | 1 |
| Sin3Ak-20 | HudsonAlpha | 1 |
| RBBP5     | Broad       | 1 |
| YY1       | HudsonAlpha | 1 |
| SP1       | HudsonAlpha | 1 |
| SP4       | HudsonAlpha | 1 |
| TAF7      | HudsonAlpha | 1 |
| TBP       | Stanford    | 1 |
| Pol2      | HudsonAlpha | 1 |
| SIN3A     | Stanford    | 1 |
| Pol2      | UT-A        | 1 |
| TAF1      | HudsonAlpha | 1 |
| Pol2      | HudsonAlpha | 1 |

P-values were computed according to the algorithm implemented in the *regioner* R package.
